# Supplementary material for: A comparison of chain-of-thought reasoning strategies across datasets and models
Source: PeerJ journal article supplement (doi:10.7717/peerj-cs.1999), 2024-04-30
Supplement: SuppTables.pdf [file SuppTables.pdf]

## S1 SUPPLEMENTARY TABLES

| Prompt           | Model avg. accuracy (CI) |
|------------------|--------------------------|
|                  | n per prompt = 1188      |
| Zhou             | <b>.68</b> (.65, .70)    |
| Articulate       | .67 (.64, .70)           |
| Rephrase         | .67 (.64, .69)           |
| Elaborate        | .66 (.63, .69)           |
| Zhou-instruction | .65 (.63, .68)           |
| Plan             | .65 (.62, .68)           |
| Kojima           | .64 (.62, .67)           |
| Direct           | .64 (.61, .67)           |
| Self-critique    | .64 (.61, .67)           |
| Converse         | .64 (.61, .66)           |

**Table S1. Accuracy of prompts.** Accuracy of prompts averaged over datasets. In Table 3, text corresponding to the prompt names can be found. Average taken over all six models. N total = 11880.

| Dataset       | Accuracy (CI)         | Base Rate |
|---------------|-----------------------|-----------|
|               | n per dataset = 1980  |           |
| WorldTree v2  | <b>.88</b> (.86, .89) | .25       |
| CommonsenseQA | .77 (.75, .79)        | .2        |
| OpenBookQA    | .74 (.72, .76)        | .25       |
| StrategyQA    | .67 (.65, .69)        | .5        |
| MedMCQA       | .49 (.46, .51)        | .25       |
| MedQA         | .38 (.36, .40)        | .2        |

**Table S2. Accuracy on datasets.** Accuracy on datasets averaged over models and prompts. Base rate for random chance, dependent on number of answer choices in datasets. N total = 11880

| Model         | Accuracy (CI)         |
|---------------|-----------------------|
|               | n per model = 1980    |
| GPT-4         | <b>.85</b> (.83, .86) |
| GPT-3.5-turbo | .74 (.72, .76)        |
| Davinci-003   | .63 (.61, .65)        |
| Flan-T5-XXL   | .61 (.59, .63)        |
| Davinci-002   | .59 (.56, .61)        |
| Command-XL    | .52 (.50, .55)        |

**Table S3. Accuracy of models.** Accuracy of models averaged over datasets and prompts. N total = 11880.

| dataset prompt   | CommonsenseQA         | MedQA                 | MedMCQA               | OpenBookQA            | StrategyQA            | WorldTree v2          |
|------------------|-----------------------|-----------------------|-----------------------|-----------------------|-----------------------|-----------------------|
| Direct           | .74 (.68, .81)        | .38 (.31, .45)        | .46 (.39, .53)        | .74 (.68, .80)        | .64 (.57, .71)        | .88 (.84, .93)        |
| Kojima           | .75 (.69, .81)        | .39 (.32, .46)        | .44 (.37, .51)        | .71 (.65, .78)        | <b>.73</b> (.67, .80) | .85 (.79, .90)        |
| Zhou             | .78 (.72, .84)        | .40 (.33, .47)        | <b>.54</b> (.47, .61) | <b>.81</b> (.75, .87) | .67 (.60, .74)        | .87 (.83, .92)        |
| Plan             | .78 (.73, .84)        | .36 (.30, .43)        | .48 (.41, .56)        | .74 (.68, .80)        | .66 (.59, .73)        | .87 (.82, .91)        |
| Articulate       | .78 (.72, .84)        | .39 (.32, .46)        | .52 (.44, .59)        | .76 (.70, .82)        | .66 (.59, .73)        | <b>.91</b> (.87, .95) |
| Rephrase         | <b>.80</b> (.75, .86) | .38 (.31, .45)        | .49 (.42, .56)        | .71 (.64, .77)        | .72 (.65, .78)        | <b>.91</b> (.87, .95) |
| Elaborate        | .75 (.68, .81)        | <b>.41</b> (.34, .48) | .53 (.46, .60)        | .74 (.67, .80)        | .68 (.61, .75)        | .87 (.82, .92)        |
| Converse         | .71 (.64, .78)        | .37 (.30, .44)        | .51 (.43, .58)        | .73 (.67, .79)        | .66 (.59, .73)        | .84 (.79, .89)        |
| Self-critique    | .79 (.73, .84)        | .37 (.30, .43)        | .44 (.37, .51)        | .75 (.69, .81)        | .62 (.55, .69)        | .87 (.82, .92)        |
| Zhou-instruction | .79 (.73, .85)        | .37 (.30, .44)        | .45 (.38, .52)        | .74 (.68, .81)        | .66 (.59, .73)        | .90 (.86, .94)        |

**Table S4. Accuracy of prompts per dataset.** Accuracy of prompts per dataset averaged over models. Average over 198 items per prompt/dataset pair. N total = 11880.

| model prompt     | Command-XL            | Flan-T5-XXL           | GPT-3.5-turbo         | GPT-4                 | Davinci-002           | Davinci-003           |
|------------------|-----------------------|-----------------------|-----------------------|-----------------------|-----------------------|-----------------------|
| Direct           | .47 (.40, .54)        | .62 (.55, .69)        | .75 (.69, .81)        | .81 (.76, .87)        | .59 (.52, .66)        | .61 (.54, .68)        |
| Kojima           | .45 (.38, .52)        | .62 (.55, .69)        | <b>.76</b> (.70, .82) | .86 (.81, .91)        | .56 (.49, .63)        | .61 (.54, .68)        |
| Zhou             | .55 (.48, .62)        | .58 (.51, .65)        | .75 (.69, .81)        | <b>.89</b> (.84, .93) | <b>.65</b> (.58, .71) | <b>.66</b> (.59, .73) |
| Plan             | .53 (.46, .60)        | .62 (.55, .69)        | .73 (.66, .79)        | .84 (.79, .89)        | .55 (.48, .62)        | .63 (.56, .70)        |
| Articulate       | .53 (.46, .60)        | <b>.65</b> (.58, .71) | .74 (.67, .80)        | .86 (.81, .91)        | .61 (.54, .69)        | .65 (.58, .72)        |
| Rephrase         | <b>.58</b> (.51, .65) | .62 (.55, .69)        | .73 (.66, .79)        | .84 (.79, .89)        | .61 (.54, .68)        | .63 (.56, .70)        |
| Elaborate        | .55 (.48, .62)        | .59 (.52, .66)        | .73 (.66, .79)        | .84 (.79, .89)        | <b>.65</b> (.58, .72) | .60 (.53, .67)        |
| Converse         | .52 (.45, .59)        | .61 (.55, .68)        | .71 (.65, .78)        | .81 (.76, .87)        | .53 (.46, .61)        | .62 (.55, .69)        |
| Self-critique    | .51 (.43, .58)        | .58 (.51, .65)        | .72 (.65, .78)        | .84 (.79, .89)        | .57 (.50, .64)        | .64 (.57, .71)        |
| Zhou-instruction | .56 (.49, .63)        | .59 (.52, .66)        | .75 (.69, .82)        | .85 (.80, .90)        | .54 (.47, .61)        | .65 (.58, .71)        |

**Table S5. Accuracy of prompts per model.** Accuracy of prompts per model averaged over datasets. Average over 198 items per prompt/model pair. N total = 11880.
